# Supplementary material
Source: Springer Nature journal article supplement (https://www.springermedizin.de/resource/supplementary/12981_2011_236_MOESM4_ESM.pdf/9604102)

A.

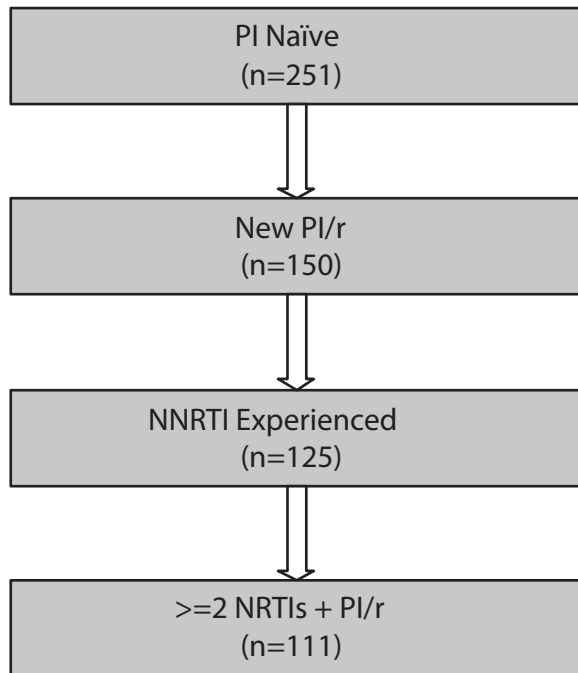

| PI    | n  | BL CD4 | BL RNA | NRTI GSS | VR (%)   |
|-------|----|--------|--------|----------|----------|
| IDV/r | 10 | 296    | 4.2    | 0.5      | 8 (80%)  |
| SQV/r | 7  | 454    | 3.5    | 0.2      | 6 (86%)  |
| FPV/r | 9  | 209    | 4.4    | 1.8      | 5 (56%)  |
| ATV/r | 33 | 271    | 3.8    | 1.8      | 26 (79%) |
| LPV/r | 50 | 226    | 4.2    | 1.8      | 41 (82%) |
| DRV/r | 2  | 195    | 3.7    | 1        | 2 (100%) |

B.

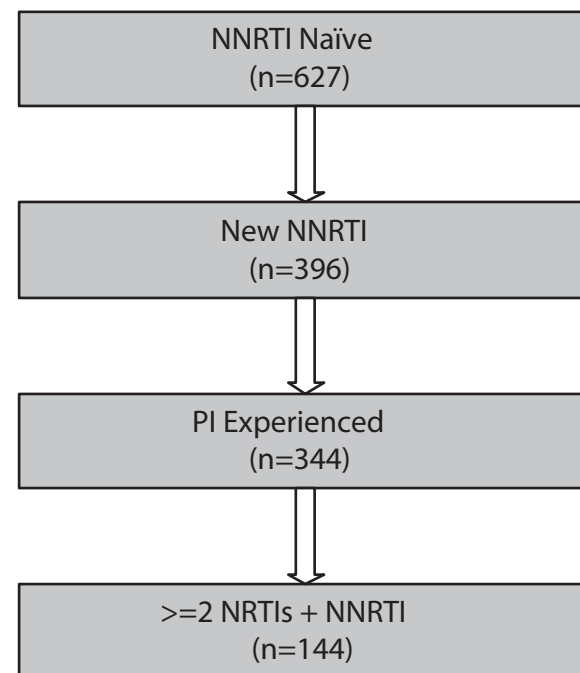

| NNRTI | n   | BL CD4 | BL RNA | NRTI GSS | VR (%)   |
|-------|-----|--------|--------|----------|----------|
| EFV   | 108 | 329    | 4      | 1.2      | 52 (48%) |
| NVP   | 36  | 295    | 4      | 1.4      | 14 (39%) |

Supplement: MOESM4 [file 9604102]
